# Supplementary material for: Real world experience of patients with amyotrophic lateral sclerosis (ALS) in the treatment of spasticity using tetrahydrocannabinol:cannabidiol (THC:CBD)
Source: Springer Nature journal article supplement (doi:10.1186/s12883-019-1443-y), 2019-09-07
Supplement: MOESM1 [file 12883_2019_1443_MOESM1_ESM-1.pdf]

**Additional file 1: Demographical and clinical characteristics data of the study participants**

| Patient ID | Age (years) | Gender | Type of onset | Disease duration | ALS-FRS | FTLD | Discontinuation | Antispasmodic medication |
|------------|-------------|--------|---------------|------------------|---------|------|-----------------|--------------------------|
| 1          | 87          | F      | S             | 89               | 11      | no   | yes             | BAC                      |
| 2          | 83          | F      | S             | 33               | 20      | no   | yes             | BAC                      |
| 3          | 68          | F      | S             | 29               | 0       | yes  | no              | no                       |
| 4          | 49          | F      | S             | 50               | 30      | no   | yes             | no                       |
| 5          | 49          | F      | S             | 61               | 23      | no   | no              | no                       |
| 6          | 74          | F      | S             | 56               | 29      | no   | no              | no                       |
| 7          | 67          | F      | S             | 76               | 21      | no   | no              | no                       |
| 8          | 42          | F      | S             | 72               | 17      | no   | yes             | no                       |
| 9          | 72          | F      | S             | 43               | 23      | no   | no              | BAC                      |
| 10         | 34          | M      | S             | 65               | 14      | no   | no              | BAC                      |
| 11         | 70          | M      | S             | 123              | 15      | no   | yes             | no                       |
| 12         | 49          | F      | S             | 40               | 15      | no   | no              | no                       |
| 13         | 71          | M      | S             | 42               | 14      | yes  | yes             | BAC                      |
| 14         | 69          | M      | S             | 10               | 25      | no   | no              | BAC, TIZ                 |
| 15         | 77          | F      | S             | 99               | 13      | no   | yes             | no                       |
| 16         | 61          | F      | S             | 27               | 16      | no   | unknown         | unknown                  |
| 17         | 66          | F      | B             | 74               | 29      | no   | no              | BAC                      |
| 18         | 76          | F      | S             | 25               | 23      | no   | unknown         | unknown                  |
| 19         | 37          | F      | S             | 137              | 25      | no   | yes             | no                       |
| 20         | 66          | F      | S             | 16               | 32      | no   | no              | no                       |
| 21         | 47          | M      | S             | 10               | 23      | yes  | no              | BAC                      |
| 22         | 36          | M      | S             | 49               | 22      | no   | no              | BAC                      |
| 23         | 51          | F      | S             | 158              | 14      | no   | yes             | no                       |
| 24         | 55          | F      | S             | 38               | 27      | no   | no              | no                       |
| 25         | 40          | F      | S             | 18               | 28      | no   | no              | no                       |
| 26         | 33          | F      | S             | 14               | 36      | no   | no              | no                       |
| 27         | 49          | M      | S             | 40               | 14      | no   | no              | no                       |
| 28         | 44          | F      | S             | 244              | 38      | no   | no              | no                       |
| 29         | 77          | M      | S             | 86               | 33      | no   | no              | no                       |
| 30         | 74          | M      | S             | 34               | 24      | no   | unknown         | unknown                  |
| 31         | 45          | F      | S             | 39               | 8       | no   | yes             | no                       |
| 32         | 56          | M      | S             | 7                | 39      | no   | no              | no                       |
| 33         | 57          | F      | S             | 41               | 42      | no   | no              | no                       |
| 34         | 35          | F      | S             | 27               | unknown | no   | no              | no                       |
| 35         | 27          | M      | S             | unknown          | unknown | no   | unknown         | unknown                  |

|    |    |   |   |     |         |    |     |     |
|----|----|---|---|-----|---------|----|-----|-----|
| 36 | 77 | M | S | 55  | 29      | no | no  | TIZ |
| 37 | 38 | M | S | 41  | 12      | no | yes | BAC |
| 38 | 59 | M | S | 82  | 18      | no | no  | no  |
| 39 | 52 | F | B | 29  | unknown | no | no  | no  |
| 40 | 52 | M | S | 39  | 34      | no | yes | no  |
| 41 | 72 | M | S | 67  | 28      | no | yes | no  |
| 42 | 58 | M | S | 111 | 28      | no | yes | no  |
| 43 | 60 | M | S | 36  | 33      | no | yes | no  |
| 44 | 60 | M | S | 78  | 16      | no | yes | no  |

---

F = Female; M = Male; S = Spinal; B = Bulbar; BAC = Baclofen; TIZ = Tizanidin; FTLT = Frontotemporal lobe degeneration
